# Supplementary material for: Simultaneous non-polar and polar lipid analysis by on-line combination of HILIC, RP and high resolution MS
Source: Royal Society of Chemistry journal article supplement (doi:10.1039/c7an01984j), 2018-01-01
Supplement: c7an01984j2.xlsx [file c7an01984j2.xlsx]

## Sheet: HumanPlasmaSRM1950_HILICRP
Class	LipidMolec	FA Groue Key	Calc Mass	Formula	BaseRt	MainIon	ARatio[s1/c]	MainS/N[s1]	MainGrade[s1]	MainArea[s1]
AcCa	AcCa(10:0)	10:0	315.241	C17 H33 O4 N1	5.727	+H	28697.2	1.60787e+07	A	29710000
AcCa	AcCa(10:1)	10:1	313.225	C17 H31 O4 N1	5.752	+H	23835.7	5.9918e+06	A	15690000
AcCa	AcCa(10:3)	10:3	309.194	C17 H27 O4 N1	5.912	+H	1659.71	2.4194e+06	A	7751000
AcCa	AcCa(11:0)	11:0	329.257	C18 H35 O4 N1	5.584	+H	135.716	750086	A	3240000
AcCa	AcCa(11:1)	11:1	327.241	C18 H33 O4 N1	5.649	+H	482.613	707894	A	2324000
AcCa	AcCa(12:0)	12:0	343.272	C19 H37 O4 N1	5.596	+H	30902.1	9.45045e+06	A	20240000
LPC	LPC(12:0)	12:0	439.27	C20 H42 O7 N1 P1	5.989	+H	841183	414403	B	841200
AcCa	AcCa(12:1)	12:1	341.257	C19 H35 O4 N1	5.504	+H	3561.42	885792	A	1698000
AcCa	AcCa(12:2)	12:2	339.241	C19 H33 O4 N1	5.66	+H	14105.5	1609.63	A	5474000
AcCa	AcCa(13:0)	13:0	357.288	C20 H39 O4 N1	5.498	+H	559.536	170.5	A	4896000
AcCa	AcCa(14:0)	14:0	371.304	C21 H41 O4 N1	5.5	+H	9535.25	6482308	A	12430000
LPC	LPC(14:0)	14:0	467.301	C22 H46 O7 N1 P1	5.82	+H	1.58869e+07	8.42887e+06	A	15890000
AcCa	AcCa(14:1)	14:1	369.288	C21 H39 O4 N1	5.506	+H	21810.5	96.59	A	40130000
AcCa	AcCa(14:2)	14:2	367.272	C21 H37 O4 N1	5.546	+H	44056	231.5	A	23630000
AcCa	AcCa(14:3)	14:3	365.257	C21 H35 O4 N1	5.595	+H	2836.16	946336	A	2845000
AcCa	AcCa(15:0)	15:0	385.319	C22 H43 O4 N1	5.403	+H	1843.83	4.95	A	1047000
LPC	LPC(15:0)	15:0	481.317	C23 H48 O7 N1 P1	5.845	+H	2763.08	4.61165e+07	A	80060000
AcCa	AcCa(16:0)	16:0	399.335	C23 H45 O4 N1	5.427	+H	4545.07	3.10346e+07	A	59310000
LPC	LPC(16:0)	16:0	495.332	C24 H50 O7 N1 P1	5.8	+H	29529.9	400.54	A	8348000000
LPE	LPE(16:0)	16:0	453.286	C21 H44 O7 N1 P1	5.967	+H	335.836	1.03453e+06	A	2099000
MG	MG(16:0)	16:0	330.277	C19 H38 O4	7.195	+H	174.919	2793.63	A	8931000
LPC	LPC(16:0e)	16:0e	479.338	C24 H50 O6 N1 P1	5.671	+H	627017	1766.77	B	125200000
LPC	LPC(16:0e)	16:0e	481.353	C24 H52 O6 N1 P1	5.853	+H	155343	2037.11	B	77400000
AcCa	AcCa(16:1)	16:1	397.319	C23 H43 O4 N1	5.447	+H	2.21347e+07	244.13	A	22130000
CE	CE(16:1)	16:1	622.569	C43 H74 O2	9.452	+NH4	2.12488e+06	660912	B	2125000
LPC	LPC(16:1)	16:1	493.317	C24 H48 O7 N1 P1	5.748	+H	15217.4	402.07	A	55500000
LPE	LPE(16:1)	16:1	451.27	C21 H42 O7 N1 P1	5.993	+H	910781	477543	B	910800
LPC	LPC(16:1e)	16:1e	477.322	C24 H48 O6 N1 P1	5.765	+H	1.10582e+07	7.14536e+06	B	11060000
AcCa	AcCa(17:0)	17:0	413.351	C24 H47 O4 N1	5.401	+H	4176.37	5401.43	A	2017000
LPC	LPC(17:0)	17:0	509.348	C25 H52 O7 N1 P1	5.776	+H	1.37621e+08	580.28	A	137600000
LPC	LPC(17:1)	17:1	507.332	C25 H50 O7 N1 P1	5.782	+H	2.90316e+07	1.10034e+07	B	29030000
AcCa	AcCa(18:0)	18:0	427.366	C25 H49 O4 N1	5.367	+H	1.64656e+07	3453.31	A	16470000
LPC	LPC(18:0)	18:0	523.364	C26 H54 O7 N1 P1	5.736	+H	13336.7	196.1	A	2962000000
MG	MG(18:0)	18:0	358.308	C21 H42 O4	7.461	+H	612.118	4.38537e+06	A	10730000
LPC	LPC(18:0e)	18:0e	507.369	C26 H54 O6 N1 P1	5.788	+H	6.07279e+07	2.76577e+07	B	60730000
AcCa	AcCa(18:1)	18:1	425.351	C25 H47 O4 N1	5.378	+H	184741	1227.32	A	84050000
CE	CE(18:1)	18:1	650.6	C45 H78 O2	9.754	+NH4	8.24453e+06	1038.13	B	8245000
LPC	LPC(18:1)	18:1	521.348	C26 H52 O7 N1 P1	5.759	+H	14074.1	109.55	A	2811000000
LPE	LPE(18:1)	18:1	479.301	C23 H46 O7 N1 P1	5.922	+H	8.05753e+06	447.01	B	8058000
LPC	LPC(18:1e)	18:1e	505.353	C26 H52 O6 N1 P1	5.637	+H	32603.9	652.93	B	15330000
AcCa	AcCa(18:2)	18:2	423.335	C25 H45 O4 N1	5.409	+H	6.00571e+07	525.41	A	60060000
CE	CE(18:2)	18:2	648.585	C45 H76 O2	9.467	+NH4	3.08916e+08	2987.08	B	308900000
LPC	LPC(18:2)	18:2	519.332	C26 H50 O7 N1 P1	5.781	+H	47729.2	671.89	A	3312000000
LPE	LPE(18:2)	18:2	477.286	C23 H44 O7 N1 P1	5.849	-H	3.40298e+06	1.89758e+06	A	3403000
LPC	LPC(18:2e)	18:2e	503.338	C26 H50 O6 N1 P1	5.767	+H	202.447	3.32515e+06	B	4795000
AcCa	AcCa(18:3)	18:3	421.319	C25 H43 O4 N1	5.436	+H	249.27	1.94674e+06	A	5028000
CE	CE(18:3)	18:3	646.569	C45 H74 O2	9.283	+NH4	2.93241e+07	9.93157e+06	B	29320000
LPC	LPC(18:3)	18:3	517.317	C26 H48 O7 N1 P1	5.834	+HCOO	6.50272e+06	2.69116e+06	A	6503000
LPE	LPE(18:3)	18:3	475.27	C23 H42 O7 N1 P1	5.972	+H	207.802	557782	B	1468000
LPC	LPC(18:4)	18:4	515.301	C26 H46 O7 N1 P1	5.849	+H	9.43121e+06	5.28436e+06	B	9431000
LPC	LPC(19:0)	19:0	537.379	C27 H56 O7 N1 P1	5.695	+H	1.0333e+07	5.76933e+06	A	10330000
LPC	LPC(19:1)	19:1	535.364	C27 H54 O7 N1 P1	5.737	+H	9.0343e+06	4.13474e+06	B	9034000
AcCa	AcCa(20:0)	20:0	455.397	C27 H53 O4 N1	5.316	+H	1.11042e+06	612518	A	1110000
LPC	LPC(20:0)	20:0	551.395	C28 H58 O7 N1 P1	5.701	+HCOO	869023	470296	A	869000
LPC	LPC(20:0e)	20:0e	535.4	C28 H58 O6 N1 P1	5.769	+H	28120.6	2.49083e+06	B	3966000
AcCa	AcCa(20:1)	20:1	453.382	C27 H51 O4 N1	5.331	+H	3.00724e+06	1.27296e+06	A	3007000
LPC	LPC(20:1)	20:1	549.379	C28 H56 O7 N1 P1	5.665	+HCOO	3.13986e+06	1.69801e+06	A	3140000
LPC	LPC(20:1e)	20:1e	533.385	C28 H56 O6 N1 P1	5.783	+H	1.31711e+06	1.20655e+06	B	1317000
AcCa	AcCa(20:2)	20:2	451.366	C27 H49 O4 N1	5.356	+H	2.6171e+06	1.14528e+06	A	2617000
LPC	LPC(20:2)	20:2	547.364	C28 H54 O7 N1 P1	5.738	+H	136770	1.97947e+07	B	40040000
AcCa	AcCa(20:3)	20:3	449.351	C27 H47 O4 N1	5.361	+H	602.849	1.78459e+06	A	3779000
LPC	LPC(20:3)	20:3	545.348	C28 H52 O7 N1 P1	5.66	+H	8803.83	136.29	B	60180000
AcCa	AcCa(20:4)	20:4	447.335	C27 H45 O4 N1	5.36	+H	2140.78	2.20509e+06	A	4557000
CE	CE(20:4)	20:4	672.585	C47 H76 O2	9.305	+NH4	241096	2152.68	B	229800000
LPC	LPC(20:4)	20:4	543.332	C28 H50 O7 N1 P1	5.717	+H	26880	565.81	B	976800000
LPE	LPE(20:4)	20:4	501.286	C25 H44 O7 N1 P1	5.794	-H	2.7113e+06	1.68854e+06	B	2711000
CE	CE(20:5)	20:5	670.569	C47 H74 O2	8.374	+H	6.21547e+06	1.65989e+06	B	6215000
CE	CE(20:5)	20:5	670.569	C47 H74 O2	9.137	+NH4	19339.5	7.39396e+06	B	23670000
LPC	LPC(20:5)	20:5	541.317	C28 H48 O7 N1 P1	5.734	+H	7.50467e+07	705.82	A	75050000
LPE	LPE(20:5)	20:5	499.27	C25 H42 O7 N1 P1	5.948	+H	4.62689e+06	1.69674e+06	B	4627000
PC	PC(21:4)	21:4	571.327	C29 H50 O8 N1 P1	5.352	+H	1.47752e+06	682141	C	1478000
AcCa	AcCa(22:0)	22:0	483.429	C29 H57 O4 N1	5.273	+H	746439	16414.7	A	746400
LPC	LPC(22:0)	22:0	579.426	C30 H62 O7 N1 P1	5.655	+H	1.8038e+06	926852	B	1804000
LPC	LPC(22:1)	22:1	577.411	C30 H60 O7 N1 P1	5.673	+H	2.88025e+06	1.46409e+06	B	2880000
AcCa	AcCa(22:4)	22:4	475.366	C29 H49 O4 N1	5.323	+H	6369.39	455443	A	847900
LPC	LPC(22:4)	22:4	571.364	C30 H54 O7 N1 P1	5.708	+H	162441	1.90531e+07	B	34580000
CE	CE(22:5)	22:5	698.6	C49 H78 O2	9.345	+NH4	5806.09	1.10309e+06	B	10140000
LPC	LPC(22:5)	22:5	569.348	C30 H52 O7 N1 P1	5.644	+H	8.75492e+06	3.94671e+06	B	8755000
LPE	LPE(22:5)	22:5	527.301	C27 H46 O7 N1 P1	5.883	+H	5.85695e+06	1.36188e+06	B	5857000
CE	CE(22:6)	22:6	696.585	C49 H76 O2	9.171	+NH4	23572.7	1.45487e+07	B	44000000
LPC	LPC(22:6)	22:6	567.332	C30 H50 O7 N1 P1	5.707	+H	1.68856e+08	8.26584e+07	B	168900000
LPE	LPE(22:6)	22:6	525.285	C27 H44 O7 N1 P1	5.866	+H	1.82058e+07	881.84	B	18210000
AcCa	AcCa(24:0)	24:0	511.46	C31 H61 O4 N1	5.231	+H	4.97468e+06	2.08848e+06	A	4975000
LPC	LPC(24:0)	24:0	607.458	C32 H66 O7 N1 P1	5.616	+H	1.54497e+06	642011	B	1545000
AcCa	AcCa(24:1)	24:1	509.444	C31 H59 O4 N1	5.245	+H	1.81828e+06	843663	A	1818000
LPC	LPC(24:1)	24:1	605.442	C32 H64 O7 N1 P1	5.64	+H	1.53042e+06	808187	B	1530000
PC	PC(24:4e)	24:4e	599.395	C32 H58 O7 N1 P1	5.672	+H	1.02387e+06	490591	C	1024000
PC	PC(24:4e)	24:4e	597.379	C32 H56 O7 N1 P1	5.696	+H	1.6765e+06	862231	C	1676000
PC	PC(26:0)	26:0	649.468	C34 H68 O8 N1 P1	5.084	+H	3.16528e+06	1.66513e+06	C	3165000
PC	PC(28:0)	28:0	677.5	C36 H72 O8 N1 P1	5.045	+H	2.52979e+07	1.1948e+07	C	25300000
PC	PC(28:1)	28:1	675.484	C36 H70 O8 N1 P1	5.047	+H	33353	2027030	C	3794000
PC	PC(29:0)	29:0	691.515	C37 H74 O8 N1 P1	5.024	+H	12479.9	2.48637e+06	C	4631000
PC	PC(30:0)	30:0	705.531	C38 H76 O8 N1 P1	5.006	+H	172203	1.04996e+08	C	218000000
PC	PC(30:0e)	30:0e	691.552	C38 H78 O7 N1 P1	4.997	+H	17947.3	3.02905e+06	C	7013000
PC	PC(16:1_14:0)	30:1	703.515	C38 H74 O8 N1 P1	5.005	+H	163932	3.45704e+07	A	76180000
PC	PC(30:2)	30:2	701.5	C38 H72 O8 N1 P1	5.014	+H	19046.4	3.59614e+06	C	8775000
PC	PC(30:3)	30:3	699.484	C38 H70 O8 N1 P1	5.044	+H	1.92099e+06	2467.04	C	1921000
PC	PC(31:0)	31:0	719.547	C39 H78 O8 N1 P1	4.995	+H	49559.6	1.63988e+07	C	37560000
PC	PC(31:1)	31:1	717.531	C39 H76 O8 N1 P1	4.989	+H	457.24	40777	C	20090000
DG	DG(16:0_16:0)	32:0	568.507	C35 H68 O5	7.982	+NH4	441.028	1.03432e+07	A	24990000
PC	PC(32:0)	32:0	733.562	C40 H80 O8 N1 P1	4.978	+H	24414.1	1.73304e+08	C	453900000
PC	PC(32:0e)	32:0e	719.583	C40 H82 O7 N1 P1	4.97	+H	24751.2	7.61622e+06	C	24510000
DG	DG(16:0_16:1)	32:1	566.491	C35 H66 O5	7.905	+NH4	66	4.45547e+06	A	8438000
PC	PC(32:1)	32:1	731.547	C40 H78 O8 N1 P1	4.972	+H	26557.4	5.57634e+08	C	1392000000
PC	PC(32:1e)	32:1e	715.552	C40 H78 O7 N1 P1	4.877	+H	1011.33	4.25338e+06	C	7495000
PC	PC(32:1e)	32:1e	717.567	C40 H80 O7 N1 P1	4.955	+H	59129.2	5.12377e+06	C	31910000
DG	DG(14:0_18:2)	32:2	564.475	C35 H64 O5	7.831	+NH4	4.89587e+06	2.45277e+06	A	4896000
PC	PC(32:2)	32:2	729.531	C40 H76 O8 N1 P1	4.978	+H	112538	1.85505e+08	C	404500000
PC	PC(32:3)	32:3	727.515	C40 H74 O8 N1 P1	4.994	+H	57458.8	5.55115e+06	C	18490000
PC	PC(32:4)	32:4	725.5	C40 H72 O8 N1 P1	4.998	+H	5464.73	479374	C	2629000
PC	PC(32:5)	32:5	723.484	C40 H70 O8 N1 P1	5.026	+H	27.87	420634	C	515300
PC	PC(33:1)	33:1	745.562	C41 H80 O8 N1 P1	4.957	+H	4625.45	3.69612e+07	C	110900000
PC	PC(33:2)	33:2	743.547	C41 H78 O8 N1 P1	4.965	+H	2148.04	5.77186e+07	C	152800000
PC	PC(33:3)	33:3	741.531	C41 H76 O8 N1 P1	4.985	+H	294.884	2150.19	C	22030000
TG	TG(6:0_11:3_16:0)	33:3	590.455	C36 H62 O6	7.624	+NH4	876.616	1.15941e+07	B	21490000
PC	PC(33:4)	33:4	739.515	C41 H74 O8 N1 P1	4.967	+H	272.474	6.87595e+06	C	22180000
DG	DG(18:0_16:0)	34:0	596.538	C37 H72 O5	8.07	+NH4	1498.57	23417.1	A	31750000
PC	PC(34:1)	34:1	759.578	C42 H82 O8 N1 P1	4.935	+H	6329.74	1.7201e+09	C	6401000000
PC	PC(34:1e)	34:1e	745.598	C42 H84 O7 N1 P1	4.927	+H	6117.4	2.79161e+07	C	81330000
DG	DG(16:0_18:2)	34:2	592.507	C37 H68 O5	7.906	+NH4	14324.7	5.08115e+07	A	99280000
PC	PC(16:0_18:2)	34:2	757.562	C42 H80 O8 N1 P1	4.943	+H	14690.9	1302.88	A	15620000000
PE	PE(16:0_18:2)	34:2	715.515	C39 H74 O8 N1 P1	5.017	+H	141.646	5.22386e+06	A	14430000
PC	PC(34:2e)	34:2e	743.583	C42 H82 O7 N1 P1	4.918	+H	19141.8	4.93376e+07	C	183600000
PC	PC(34:2e)	34:2e	741.567	C42 H80 O7 N1 P1	4.983	+H	30265.9	9.66525e+07	C	224500000
DG	DG(16:1_18:2)	34:3	590.491	C37 H66 O5	7.839	+NH4	2989.45	7.56683e+06	A	24330000
PC	PC(34:3)	34:3	755.547	C42 H78 O8 N1 P1	4.954	+H	18615.9	1.90394e+08	C	713300000
PE	PE(34:3)	34:3	713.5	C39 H72 O8 N1 P1	5.022	+H	352.442	641398	C	2572000
PC	PC(34:4)	34:4	753.531	C42 H76 O8 N1 P1	4.906	+H	118510	1.87812e+07	C	64510000
PC	PC(34:5)	34:5	751.515	C42 H74 O8 N1 P1	4.981	+H	6966.32	2.25376e+06	C	5068000
PC	PC(35:1)	35:1	773.593	C43 H84 O8 N1 P1	4.912	+H	6839.84	2.82728e+07	C	79870000
PC	PC(35:2)	35:2	771.578	C43 H82 O8 N1 P1	4.916	+H	6017.2	8.90992e+07	C	232200000
PC	PC(35:3e)	35:3e	753.567	C43 H80 O7 N1 P1	4.85	+H	14342.7	4.04945e+06	C	11500000
TG	TG(10:0_12:0_14:0)	36:0	638.548	C39 H74 O6	8.147	+NH4	21.584	1595.76	A	12270000
DG	DG(18:0_18:1)	36:1	622.554	C39 H74 O5	8.055	+NH4	2306.79	4.6179e+06	A	12760000
PC	PC(36:1)	36:1	787.609	C44 H86 O8 N1 P1	4.899	+H	3674.52	4.6446e+08	C	1257000000
TG	TG(4:0_14:0_18:1)	36:1	636.533	C39 H72 O6	8.047	+NH4	164.631	2.80981e+06	A	10970000
DG	DG(18:1_18:1)	36:2	620.538	C39 H72 O5	7.984	+NH4	49676.9	2120.65	A	235600000
PC	PC(36:2)	36:2	785.593	C44 H84 O8 N1 P1	4.899	+H	4316.78	1860.5	C	6982000000
PC	PC(18:0e_18:2)	36:2e	769.598	C44 H84 O7 N1 P1	4.895	+HCOO	4878.25	14374.6	B	4858000
PC	PC(36:2e)	36:2e	771.614	C44 H86 O7 N1 P1	4.882	+H	22446.8	2.34472e+07	C	60320000
DG	DG(18:1_18:2)	36:3	618.522	C39 H70 O5	7.909	+NH4	13538.3	2104.85	A	259800000
PC	PC(36:3)	36:3	783.578	C44 H82 O8 N1 P1	4.887	+H	11680.7	991.81	C	5769000000
PE	PE(16:0_20:3)	36:3	741.531	C41 H76 O8 N1 P1	5.003	+H	295.71	8.93566e+06	B	22090000
DG	DG(18:2_18:2)	36:4	616.507	C39 H68 O5	7.842	+NH4	9.99868e+07	3.39835e+07	A	99990000
PC	PC(36:4)	36:4	781.562	C44 H80 O8 N1 P1	4.862	+H	25245.3	3.22741e+09	C	8809000000
PE	PE(16:0_20:4)	36:4	739.515	C41 H74 O8 N1 P1	4.964	+H	272.677	6.87595e+06	A	22180000
PC	PC(36:4e)	36:4e	765.567	C44 H80 O7 N1 P1	4.795	+H	63352.2	1246.84	C	1263000000
PC	PC(36:4e)	36:4e	767.583	C44 H82 O7 N1 P1	4.831	+H	39738.8	1982	C	728900000
PE	PE(16:0e_20:4)	36:4e	723.52	C41 H74 O7 N1 P1	4.846	+H	916.079	6.69932e+06	B	17420000
DG	DG(18:3_18:2)	36:5	614.491	C39 H66 O5	7.797	+NH4	1.51145e+07	4.14911e+06	A	15110000
PC	PC(36:5)	36:5	779.547	C44 H78 O8 N1 P1	4.875	+H	17293.4	2.89852e+08	C	676400000
PC	PC(36:5e)	36:5e	763.552	C44 H78 O7 N1 P1	4.809	+H	2667.07	75191.2	C	39500000
PC	PC(36:6)	36:6	777.531	C44 H76 O8 N1 P1	4.878	+H	42266.4	1.05018e+07	C	17550000
PC	PC(37:2)	37:2	799.609	C45 H86 O8 N1 P1	4.889	+H	20730.7	1.32426e+07	C	28730000
DG	DG(19:1_18:2)	37:3	632.538	C40 H72 O5	7.958	+NH4	1.57653e+06	599927	B	1577000
PC	PC(37:4)	37:4	795.578	C45 H82 O8 N1 P1	4.837	+H	158544	7.01347e+07	C	145400000
PC	PC(37:6)	37:6	791.547	C45 H78 O8 N1 P1	4.859	+H	2297.83	5.73286e+06	C	15730000
TG	TG(12:0_12:0_14:0)	38:0	666.58	C41 H78 O6	8.214	+NH4	30.614	2511.05	A	12530000
TG	TG(4:0_16:0_18:1)	38:1	664.564	C41 H76 O6	8.144	+NH4	755.59	4.74072e+06	A	14330000
TG	TG(4:0_16:0_18:2)	38:2	662.548	C41 H74 O6	8.056	+NH4	1.50318e+07	5.13648e+06	A	15030000
PC	PC(38:3)	38:3	811.609	C46 H86 O8 N1 P1	4.985	+H	7435.87	96.22	C	1672000000
PC	PC(38:4)	38:4	809.593	C46 H84 O8 N1 P1	4.834	+H	17847	3824.74	C	6545000000
PE	PE(18:0_20:4)	38:4	767.547	C43 H78 O8 N1 P1	4.931	-H	6037.06	104.49	A	8001000
PI	PI(18:0_20:4)	38:4	886.557	C47 H83 O13 N0 P1	5.976	-H	1.57604e+06	752332	A	1576000
PC	PC(38:4e)	38:4e	793.598	C46 H84 O7 N1 P1	4.801	+H	103297	746.94	C	1653000000
PC	PC(38:5)	38:5	807.578	C46 H82 O8 N1 P1	4.829	+H	30225.5	3550.08	C	3449000000
PE	PE(18:1_20:4)	38:5	765.531	C43 H76 O8 N1 P1	4.925	+H	751.573	4.11872e+06	A	7221000
PE	PE(18:1e_20:4)	38:5e	749.536	C43 H76 O7 N1 P1	4.8	+H	2280.94	183.66	A	75760000
DG	DG(18:2_20:4)	38:6	640.507	C41 H68 O5	7.82	+NH4	1658.58	9.06531e+06	A	22480000
PC	PC(38:6)	38:6	805.562	C46 H80 O8 N1 P1	4.841	+H	60330.4	2520.14	C	2770000000
PE	PE(16:0_22:6)	38:6	763.515	C43 H74 O8 N1 P1	4.939	-H	8.54656e+06	4.97475e+06	A	8547000
PC	PC(16:0e_22:6)	38:6e	789.567	C46 H80 O7 N1 P1	4.79	+H	204276	724.75	B	197000000
PC	PC(38:6e)	38:6e	791.583	C46 H82 O7 N1 P1	4.765	+H	949043	5047.89	C	796200000
PE	PE(16:0e_22:6)	38:6e	747.52	C43 H74 O7 N1 P1	4.819	+H	2769.69	6.4303e+06	B	25370000
DG	DG(38:7)	38:7	638.491	C41 H66 O5	7.772	+NH4	3.55724e+06	1.24513e+06	C	3557000
PC	PC(38:7)	38:7	803.547	C46 H78 O8 N1 P1	4.847	+H	20268.5	2.09731e+07	C	69010000
PC	PC(38:7e)	38:7e	787.552	C46 H78 O7 N1 P1	4.782	+H	18299.7	4.76399e+06	C	8516000
TG	TG(6:0_16:0_18:2)	40:2	690.58	C43 H78 O6	8.138	+NH4	9.4305e+06	8004.5	A	9430000
TG	TG(4:0_18:1_18:2)	40:3	688.564	C43 H76 O6	8.048	+NH4	1241.35	1.50118e+06	A	5856000
DG	DG(18:1_22:3)	40:4	672.569	C43 H76 O5	8.012	+NH4	1.62441e+06	639075	B	1624000
PC	PC(40:4)	40:4	837.625	C48 H88 O8 N1 P1	4.826	+H	24282.8	3807	C	333100000
TG	TG(4:0_18:2_18:2)	40:4	686.548	C43 H74 O6	8.022	+NH4	2.97624e+06	665643	A	2976000
DG	DG(18:1_22:4)	40:5	670.554	C43 H74 O5	7.947	+NH4	9.43303e+06	1.67756e+06	A	9433000
PC	PC(18:0_22:5)	40:5	835.609	C48 H86 O8 N1 P1	4.808	+H	37398.6	63835.2	A	960400000
PC	PC(40:6)	40:6	833.593	C48 H84 O8 N1 P1	4.791	+H	49475.1	7.74336e+08	C	1701000000
PC	PC(40:6e)	40:6e	817.598	C48 H84 O7 N1 P1	4.784	+H	496802	34063.4	C	293100000
PC	PC(40:6e)	40:6e	819.614	C48 H86 O7 N1 P1	4.801	+H	146906	4568.77	C	348500000
PE	PE(18:0e_22:6)	40:6e	775.552	C45 H78 O7 N1 P1	4.785	+H	1614.65	5572.69	B	30750000
DG	DG(22:5_18:2)	40:7	666.522	C43 H70 O5	7.842	+NH4	9.4839e+06	2.88337e+06	B	9484000
PC	PC(40:7)	40:7	831.578	C48 H82 O8 N1 P1	4.8	+H	44389.4	38577.5	C	457000000
PC	PC(40:7e)	40:7e	815.583	C48 H82 O7 N1 P1	4.745	+H	153942	3.01857e+07	C	81460000
PE	PE(18:1e_22:6)	40:7e	773.536	C45 H76 O7 N1 P1	4.781	+H	4597.33	1.44287e+07	B	31150000
PC	PC(40:8)	40:8	829.562	C48 H80 O8 N1 P1	4.793	+H	266822	3.90628e+07	C	111100000
PC	PC(40:8e)	40:8e	813.567	C48 H80 O7 N1 P1	4.757	+H	35166.8	4.6041e+06	C	12360000
TG	TG(15:0_10:0_16:0)	41:0	708.627	C44 H84 O6	8.373	+NH4	35.323	272.04	A	2396000
TG	TG(16:0_8:0_18:1)	42:1	720.627	C45 H84 O6	8.308	+NH4	948.712	3176.05	A	49280000
PC	PC(42:10)	42:10	853.562	C50 H80 O8 N1 P1	4.751	+H	56308.8	1.56413e+07	C	32950000
TG	TG(12:0_12:0_18:2)	42:2	718.611	C45 H82 O6	8.216	+NH4	5066.25	5.20473e+06	A	20950000
TG	TG(16:1_8:0_18:2)	42:3	716.596	C45 H80 O6	8.068	+NH4	1.54056e+06	347034	A	1541000
PC	PC(42:3e)	42:3e	851.677	C50 H94 O7 N1 P1	4.777	+H	178469	1.86926e+07	C	70040000
TG	TG(6:0_18:2_18:2)	42:4	714.58	C45 H78 O6	8.047	+NH4	255.455	707493	A	4506000
PC	PC(42:5)	42:5	863.64	C50 H90 O8 N1 P1	4.765	+H	115379	6.44947e+06	C	23170000
TG	TG(4:0_16:0_22:5)	42:5	712.564	C45 H76 O6	8.021	+NH4	1300.78	2645.86	A	2706000
PC	PC(42:6)	42:6	861.625	C50 H88 O8 N1 P1	4.807	+H	75295.8	1.15919e+07	C	34520000
PC	PC(42:6e)	42:6e	845.63	C50 H88 O7 N1 P1	4.766	+H	80286.4	1.43695e+07	C	58950000
PC	PC(42:6e)	42:6e	847.645	C50 H90 O7 N1 P1	4.766	+H	340957	4.75555e+07	C	152700000
PC	PC(42:7)	42:7	859.609	C50 H86 O8 N1 P1	4.782	+H	1372.67	1.37622e+07	C	33520000
PC	PC(42:7e)	42:7e	843.614	C50 H86 O7 N1 P1	4.763	+H	76057.1	6.08263e+06	C	23750000
PC	PC(42:9)	42:9	855.578	C50 H82 O8 N1 P1	4.783	+H	87563.4	1.29099e+07	C	36280000
TG	TG(15:0_12:0_16:0)	43:0	736.658	C46 H88 O6	8.462	+NH4	169.668	1.5221e+06	A	5361000
TG	TG(16:0_9:0_18:1)	43:1	734.642	C46 H86 O6	8.365	+NH4	3512.82	2.18027e+06	A	8184000
TG	TG(16:0_12:0_16:0)	44:0	750.674	C47 H90 O6	8.541	+NH4	13.592	450919	A	38040000
TG	TG(16:0_10:0_18:1)	44:1	748.658	C47 H88 O6	8.406	+NH4	3261.58	4.23756e+07	A	139200000
PC	PC(44:10)	44:10	881.593	C52 H84 O8 N1 P1	4.762	+H	9728.68	1.21955e+06	C	3965000
TG	TG(18:1_12:0_14:1)	44:2	746.642	C47 H86 O6	8.319	+NH4	4143.75	2.50316e+07	B	72850000
PC	PC(44:4)	44:4	893.687	C52 H96 O8 N1 P1	4.754	+H	12207.2	907849	C	3605000
TG	TG(8:0_18:2_18:3)	44:5	740.596	C47 H80 O6	8.072	+NH4	772.479	531855	B	2882000
PC	PC(44:8)	44:8	885.625	C52 H88 O8 N1 P1	4.757	+H	4.16407e+06	2.07659e+06	C	4164000
TG	TG(15:0_14:0_16:0)	45:0	764.689	C48 H92 O6	8.594	+NH4	1.654	2.27155e+06	A	6625000
TG	TG(16:0_14:0_16:0)	46:0	778.705	C49 H94 O6	8.688	+NH4	4.779	34.98	A	30420000
TG	TG(16:0_12:1_18:1)	46:2	774.674	C49 H90 O6	8.411	+NH4	7444.26	4933.9	A	324600000
TG	TG(10:0_18:2_18:3)	46:5	768.627	C49 H84 O6	8.166	+NH4	874.872	8499.47	A	5579000
TG	TG(15:0_16:0_16:0)	47:0	792.721	C50 H96 O6	8.738	+NH4	1.335	2.50349e+06	A	9102000
TG	TG(15:0_16:0_16:1)	47:1	790.705	C50 H94 O6	8.594	+NH4	8.572	1.32247e+07	A	46800000
TG	TG(15:0_16:1_16:1)	47:2	788.689	C50 H92 O6	8.457	+NH4	1623.04	1.05611e+07	A	37110000
TG	TG(12:0_17:1_18:2)	47:3	786.674	C50 H90 O6	8.361	+NH4	3510.56	44232.3	A	15140000
TG	TG(18:2_11:2_18:2)	47:6	780.627	C50 H84 O6	8.204	+NH4	3199.78	1.02965e+06	B	2822000
TG	TG(16:0_14:0_18:1)	48:1	804.721	C51 H96 O6	8.66	+NH4	114.865	602.34	A	759100000
TG	TG(16:1_14:0_18:1)	48:2	802.705	C51 H94 O6	8.523	+NH4	369.63	47327.6	A	1060000000
TG	TG(16:1_14:0_18:2)	48:3	800.689	C51 H92 O6	8.407	+NH4	18193.2	5599.45	A	668400000
TG	TG(12:0_18:2_18:2)	48:4	798.674	C51 H90 O6	8.32	+NH4	32078.7	1325.8	A	160500000
TG	TG(12:0_18:2_18:3)	48:5	796.658	C51 H88 O6	8.231	+NH4	3069.09	4.04259e+06	A	26200000
TG	TG(18:2_12:2_18:2)	48:6	794.642	C51 H86 O6	8.179	+NH4	786.164	1.06163e+06	A	5456000
TG	TG(16:0_16:0_17:0)	49:0	820.752	C52 H100 O6	8.85	+NH4	3.445	931760	A	2842000
TG	TG(15:0_16:0_18:1)	49:1	818.736	C52 H98 O6	8.72	+NH4	110.999	4.55384e+07	A	130400000
TG	TG(15:0_16:1_18:1)	49:2	816.721	C52 H96 O6	8.595	+NH4	70.198	4.9579e+07	B	163300000
TG	TG(16:1_16:1_17:1)	49:3	814.705	C52 H94 O6	8.457	+NH4	46424.6	2845.82	A	77680000
TG	TG(18:2_14:1_17:1)	49:4	812.689	C52 H92 O6	8.39	+NH4	5490.61	4.85056e+06	A	21300000
TG	TG(17:0_14:2_18:3)	49:5	810.674	C52 H90 O6	8.289	+NH4	2205.53	1.39002e+06	B	5678000
TG	TG(16:0_16:0_18:1)	50:1	832.752	C53 H100 O6	8.51	+Na	1092.64	3.01994e+06	A	10500000
TG	TG(16:0_16:0_18:1)	50:1	832.752	C53 H100 O6	8.802	+NH4	1855.61	89.26	A	1651000000
TG	TG(16:0e_16:0_18:1)	50:1e	818.773	C53 H102 O5	9.157	+NH4	35.389	598913	B	1722000
TG	TG(16:0_16:1_18:1)	50:2	830.736	C53 H98 O6	8.65	+NH4	11105.8	312.24	A	3441000000
TG	TG(16:0_16:1_18:2)	50:3	828.721	C53 H96 O6	8.52	+NH4	3914.77	360	A	2795000000
TG	TG(16:0_16:1_18:2)	50:3	828.721	C53 H96 O6	9.304	+NH4	348.653	5.67	A	2686000
TG	TG(16:0_16:1_18:3)	50:4	826.705	C53 H94 O6	8.413	+NH4	100784	3.03686e+08	A	1328000000
TG	TG(18:2_14:1_18:2)	50:5	824.689	C53 H92 O6	8.322	+NH4	157577	481.44	B	261600000
TG	TG(18:3_14:2_18:2)	50:7	820.658	C53 H88 O6	8.209	+H	3413.36	4503.5	A	7118000
TG	TG(16:0_17:0_18:1)	51:1	846.768	C54 H102 O6	8.841	+NH4	1183.59	1.96569e+07	A	73760000
TG	TG(16:0_17:1_18:1)	51:2	844.752	C54 H100 O6	8.715	+NH4	31080.6	145.15	A	358700000
TG	TG(16:0_17:1_18:2)	51:3	842.736	C54 H98 O6	8.583	+NH4	81694.4	1.1666e+08	A	357800000
TG	TG(15:0_18:2_18:2)	51:4	840.721	C54 H96 O6	8.47	+NH4	1.65917e+08	4.28669e+07	A	165900000
TG	TG(15:0_18:3_18:3)	51:6	836.689	C54 H92 O6	8.305	+NH4	6144.84	1.80054e+06	A	8706000
TG	TG(18:0_16:0_18:1)	52:1	860.783	C55 H104 O6	8.956	+NH4	736.952	141.11	B	408700000
TG	TG(18:0e_16:0_18:1)	52:1e	844.788	C55 H104 O5	9.115	+NH4	35.546	824071	B	2513000
TG	TG(16:0_18:1_18:1)	52:2	858.768	C55 H102 O6	8.785	+NH4	14317.5	142.49	A	6378000000
TG	TG(18:0e_16:0_18:2)	52:2e	842.773	C55 H102 O5	8.938	+NH4	78.785	991746	B	3232000
TG	TG(16:0_18:1_18:2)	52:3	856.752	C55 H100 O6	8.647	+NH4	12724.7	443.06	A	9165000000
TG	TG(16:0_18:2_18:2)	52:4	854.736	C55 H98 O6	8.53	+NH4	18119.2	1527.34	A	7313000000
TG	TG(16:1_18:1_18:3)	52:5	852.721	C55 H96 O6	8.427	+NH4	17429.5	1460.23	A	2643000000
TG	TG(18:4_16:0_18:1)	52:5	852.721	C55 H96 O6	8.018	+H	538.38	1.09613e+06	A	3069000
TG	TG(16:0_14:0_22:6)	52:6	850.705	C55 H94 O6	8.344	+NH4	294495	7.7448e+07	A	438200000
TG	TG(16:1_18:3_18:3)	52:7	848.689	C55 H92 O6	8.276	+NH4	7098.68	8.89997e+06	A	49320000
TG	TG(17:0_18:1_18:1)	53:2	872.783	C56 H104 O6	8.855	+NH4	1292.2	517.31	A	148000000
TG	TG(17:0_18:1_18:2)	53:3	870.768	C56 H102 O6	8.712	+NH4	39580.5	8.34777e+07	A	291700000
TG	TG(18:1_17:1_18:2)	53:4	868.752	C56 H100 O6	8.573	+NH4	88882.9	73.74	A	234000000
TG	TG(18:2_17:1_18:2)	53:5	866.736	C56 H98 O6	8.473	+NH4	27454.9	2.3195e+07	A	111200000
TG	TG(15:0_18:2_20:5)	53:7	862.705	C56 H94 O6	8.329	+NH4	600.499	1.70917e+06	A	7365000
TG	TG(18:0_18:0_18:1)	54:1	888.815	C57 H108 O6	9.136	+NH4	66.57	26.23	A	20610000
TG	TG(18:0_18:1_18:1)	54:2	886.799	C57 H106 O6	8.941	+NH4	1163.59	191.1	A	576200000
TG	TG(18:1_18:1_18:1)	54:3	884.783	C57 H104 O6	8.775	+NH4	15429.6	278.23	A	2652000000
TG	TG(18:1_18:1_18:2)	54:4	882.768	C57 H102 O6	8.636	+NH4	16596.1	349.29	A	3388000000
TG	TG(18:1_18:2_18:2)	54:5	880.752	C57 H100 O6	8.526	+NH4	19014.1	356.2	A	4401000000
TG	TG(18:1_18:2_18:3)	54:6	878.736	C57 H98 O6	8.428	+NH4	105415	1145.63	A	2760000000
TG	TG(16:0_18:2_20:5)	54:7	876.721	C57 H96 O6	8.355	+NH4	189680	1.27989e+08	A	725300000
TG	TG(18:3_18:2_18:3)	54:8	874.705	C57 H94 O6	8.287	+NH4	92432.7	1.74914e+07	A	104700000
TG	TG(19:0_18:1_18:1)	55:2	900.815	C58 H108 O6	8.841	+NH4	82.212	6.5335e+06	A	21580000
TG	TG(19:1_18:1_18:1)	55:3	898.799	C58 H106 O6	8.531	+NH4	516.224	3.39757e+06	A	17990000
TG	TG(19:1_18:1_18:1)	55:3	898.799	C58 H106 O6	8.834	+NH4	498.582	116.46	A	20520000
TG	TG(19:1_18:1_18:2)	55:4	896.783	C58 H104 O6	8.709	+NH4	9510.77	9.98687e+06	A	36630000
TG	TG(19:1_18:2_18:2)	55:5	894.768	C58 H102 O6	8.603	+NH4	1612.81	8.69	A	36070000
TG	TG(20:3_17:1_18:2)	55:6	892.752	C58 H100 O6	8.532	+NH4	22980.9	6.81843e+06	A	46540000
TG	TG(18:2_17:1_20:4)	55:7	890.736	C58 H98 O6	8.432	+NH4	10393.1	257.37	A	31160000
TG	TG(15:0_18:2_22:6)	55:8	888.721	C58 H96 O6	8.346	+NH4	10501.2	1.99423e+06	A	8095000
TG	TG(18:3_18:2_20:5)	56:10	898.705	C59 H94 O6	8.222	+NH4	1.28972e+07	9936.5	A	12900000
TG	TG(18:0_18:1_20:1)	56:2	914.83	C59 H110 O6	9.122	+NH4	182.333	30.09	A	13830000
TG	TG(20:1_18:1_18:1)	56:3	912.815	C59 H108 O6	8.917	+NH4	2537.63	85.95	A	88260000
TG	TG(18:0_18:1_20:3)	56:4	910.799	C59 H106 O6	8.721	+NH4	13695.3	3.88421e+07	A	479400000
TG	TG(18:1_18:1_20:3)	56:5	908.783	C59 H104 O6	8.724	+NH4	2615.28	377.8	A	600500000
TG	TG(18:1_18:1_20:4)	56:6	906.768	C59 H102 O6	8.586	+NH4	63433.1	796.27	A	1313000000
TG	TG(16:0_18:1_22:6)	56:7	904.752	C59 H100 O6	8.466	+NH4	293326	24282	A	1392000000
TG	TG(16:0_18:2_22:6)	56:8	902.736	C59 H98 O6	8.394	+NH4	372271	4108.56	A	682500000
TG	TG(18:3_18:2_20:4)	56:9	900.721	C59 H96 O6	8.308	+NH4	1.29303e+08	3.12377e+07	A	129300000
TG	TG(17:0_18:1_22:4)	57:5	922.799	C60 H106 O6	8.728	+NH4	322.524	755.39	A	5945000
TG	TG(17:0_18:1_22:5)	57:6	920.783	C60 H104 O6	8.63	+NH4	4500.64	2.67968e+06	A	8584000
TG	TG(18:2_17:1_22:6)	57:9	914.736	C60 H98 O6	8.362	+NH4	4.37861e+06	1.16881e+06	A	4379000
TG	TG(16:0_20:4_22:6)	58:10	926.736	C61 H98 O6	8.318	+NH4	194773	65973.2	A	119900000
TG	TG(18:1_18:1_22:0)	58:2	942.861	C61 H114 O6	9.279	+NH4	2.851	852290	A	4152000
TG	TG(18:1_18:2_22:0)	58:3	940.846	C61 H112 O6	9.138	+NH4	95.892	1.44154e+06	A	6427000
TG	TG(18:1_18:2_22:1)	58:4	938.83	C61 H110 O6	8.929	+NH4	447.03	40.45	A	11860000
TG	TG(18:0_18:1_22:4)	58:5	936.815	C61 H108 O6	8.724	+NH4	2080.87	11.63	A	49670000
TG	TG(18:0_18:1_22:5)	58:6	934.799	C61 H106 O6	8.7	+NH4	4794.38	37.65	A	92070000
TG	TG(18:0_18:1_22:6)	58:7	932.783	C61 H104 O6	8.556	+NH4	22586.6	197.66	A	190500000
TG	TG(18:0_20:4_20:4)	58:8	930.768	C61 H102 O6	8.485	+NH4	3.33834e+08	4.13575e+07	A	333800000
TG	TG(18:1_20:4_20:4)	58:9	928.752	C61 H100 O6	8.414	+NH4	102384	352.75	A	277000000
TG	TG(18:2_20:4_22:6)	60:12	950.736	C63 H98 O6	8.272	+NH4	1.89824e+07	1779.02	A	18980000
TG	TG(18:0_20:4_22:4)	60:8	958.799	C63 H106 O6	8.573	+NH4	10827.1	68.31	A	26720000
TG	TG(22:4_20:4_20:4)	62:12	978.768	C65 H102 O6	8.32	+NH4	8.70766e+06	2804.39	A	8708000
AcCa	AcCa(8:0)	8:0	287.21	C15 H29 O4 N1	5.932	+H	3905.53	2614.44	A	9784000
SM	SM(d28:1)	d28:1	618.474	C33 H67 O6 N2 P1	5.646	+H	1.19196e+06	647013	C	1192000
SM	SM(d30:1)	d30:1	646.505	C35 H71 O6 N2 P1	5.6	+H	3.43358e+06	1.68344e+06	C	3434000
SM	SM(d30:2)	d30:2	644.489	C35 H69 O6 N2 P1	5.61	+H	72.751	520861	C	1082000
SM	SM(d31:1)	d31:1	660.521	C36 H73 O6 N2 P1	5.579	+H	5970.56	568192	C	1162000
SM	SM(d32:0)	d32:0	676.552	C37 H77 O6 N2 P1	5.478	+H	1.29907e+06	625002	C	1299000
SM	SM(d32:1)	d32:1	674.536	C37 H75 O6 N2 P1	5.559	+H	138246	2.62411e+07	C	50300000
SM	SM(d32:2)	d32:2	672.521	C37 H73 O6 N2 P1	5.569	+H	16026.2	9.33506e+06	C	18940000
SM	SM(d33:1)	d33:1	688.552	C38 H77 O6 N2 P1	5.544	+H	33400.7	3878.34	C	21580000
SM	SM(d33:2)	d33:2	686.536	C38 H75 O6 N2 P1	5.548	+H	5189.71	1.71663e+06	C	3846000
SM	SM(d34:0)	d34:0	704.583	C39 H81 O6 N2 P1	5.449	+H	42196.1	6.13911e+06	C	14350000
Cer	Cer(d18:0+pO_16:0)	d34:0+eO	555.523	C34 H69 O4 N1	7.838	+H-H2O	458.326	1459.57	B	6317000
Cer	Cer(d18:1_16:0)	d34:1	537.512	C34 H67 O3 N1	7.831	+H	696.204	3.01696e+06	B	6573000
HexCer	HexCer(d18:1_16:0)	d34:1	699.565	C40 H77 O8 N1	2.437	+H	281.143	91670.6	A	9038000
SM	SM(d34:1)	d34:1	702.568	C39 H79 O6 N2 P1	5.527	+H	20698.7	580.49	C	422800000
HexCer	HexCer(d18:2_16:0)	d34:2	697.549	C40 H75 O8 N1	2.473	+H	5867.23	92371.5	B	2670000
SM	SM(d34:2)	d34:2	700.552	C39 H77 O6 N2 P1	5.534	+H	129321	524.58	C	333000000
SM	SM(d34:3)	d34:3	698.536	C39 H75 O6 N2 P1	5.531	+H	12579.2	2.20257e+06	C	6133000
SM	SM(d34:4)	d34:4	696.521	C39 H73 O6 N2 P1	5.559	+H	14605.8	1.52751e+06	C	2952000
SM	SM(d34:5)	d34:5	694.505	C39 H71 O6 N2 P1	5.571	+H	3923.84	651714	C	1173000
SM	SM(d35:1)	d35:1	716.583	C40 H81 O6 N2 P1	5.511	+H	41694.6	28632.1	C	8780000
SM	SM(d35:2)	d35:2	714.568	C40 H79 O6 N2 P1	5.515	+H	9202.01	2.58823e+06	C	6406000
SM	SM(d35:4)	d35:4	710.536	C40 H75 O6 N2 P1	5.545	+H	3923.4	12338.2	C	1163000
Cer	Cer(d36:0+pO)	d36:0+eO	583.554	C36 H73 O4 N1	8.007	+H-H2O	3617.05	680.96	C	27000000
Cer	Cer(d18:1_18:0)	d36:1	565.543	C36 H71 O3 N1	8.009	+H	4230.35	1.23925e+07	B	27790000
SM	SM(d36:1)	d36:1	730.599	C41 H83 O6 N2 P1	5.414	+H	5201.84	24.66	C	2493000
SM	SM(d36:2)	d36:2	728.583	C41 H81 O6 N2 P1	5.503	+HCOO	14546	4.2831e+06	C	10490000
SM	SM(d36:3)	d36:3	726.568	C41 H79 O6 N2 P1	5.499	+H	56494.9	804.24	C	40940000
SM	SM(d36:4)	d36:4	724.552	C41 H77 O6 N2 P1	5.522	+H	51171	7166.2	C	23730000
SM	SM(d36:5)	d36:5	722.536	C41 H75 O6 N2 P1	5.534	+H	104347	7.36043e+06	C	16140000
SM	SM(d37:1)	d37:1	744.615	C42 H85 O6 N2 P1	5.484	+H	5462.43	1.00379e+06	C	2661000
SM	SM(d37:2)	d37:2	742.599	C42 H83 O6 N2 P1	5.481	+H	7230.17	637279	C	2022000
Cer	Cer(d38:0)	d38:0	595.59	C38 H77 O3 N1	8.026	+H-H2O	4.68594e+06	2.16016e+06	C	4686000
SM	SM(d38:1)	d38:1	758.63	C43 H87 O6 N2 P1	5.469	+H	78127.6	19107.4	C	26950000
Cer	Cer(d18:1+hO_20:0)	d38:1+hO	609.57	C38 H75 O4 N1	7.933	+H-H2O	216.558	338682	B	1554000
Cer	Cer(d18:2_20:0)	d38:2	591.559	C38 H73 O3 N1	7.933	+H	204.926	339447	B	1441000
SM	SM(d20:0_18:2)	d38:2	756.615	C43 H85 O6 N2 P1	5.468	+H	29892.9	575.72	B	27480000
SM	SM(d38:3)	d38:3	754.599	C43 H83 O6 N2 P1	5.47	+H	20134.8	3.61443e+06	C	9073000
SM	SM(d38:4)	d38:4	752.583	C43 H81 O6 N2 P1	5.494	+H	12387.5	1.61293e+06	C	5929000
SM	SM(d38:5)	d38:5	750.568	C43 H79 O6 N2 P1	5.498	+H	90.75	5295.97	C	6580000
SM	SM(d38:6)	d38:6	748.552	C43 H77 O6 N2 P1	5.497	+H	6351.05	896640	C	2167000
Cer	Cer(d16:0+pO_23:0)	d39:0+eO	625.601	C39 H79 O4 N1	8.038	+H-H2O	677.196	696395	B	1937000
Cer	Cer(d16:1_23:0)	d39:1	607.59	C39 H77 O3 N1	8.053	+H	677.352	696799	B	1937000
SM	SM(d39:1)	d39:1	772.646	C44 H89 O6 N2 P1	5.451	+H	16431.3	2.67798e+06	C	7649000
SM	SM(d39:2)	d39:2	770.63	C44 H87 O6 N2 P1	5.453	+H	6171.13	1.32324e+06	C	2916000
Cer	Cer(d40:0)	d40:0	623.622	C40 H81 O3 N1	8.104	+H-H2O	8.64065e+06	3.45494e+06	C	8641000
Cer	Cer(d40:0+pO)	d40:0+eO	639.617	C40 H81 O4 N1	8.092	+H-2H2O	2.82024e+06	1.03793e+06	C	2820000
Cer	Cer(d40:1)	d40:1	621.606	C40 H79 O3 N1	8.085	+H-H2O	2.8221e+06	957204	C	2822000
HexCer	HexCer(d18:1_22:0)	d40:1	783.659	C46 H89 O8 N1	2.229	+H	4931.18	640807	A	4117000
Cer	Cer(d40:1+hO)	d40:1+hO	637.601	C40 H79 O4 N1	8.015	+H-2H2O	1050.66	3.54624e+06	C	8101000
Cer	Cer(d18:2_22:0)	d40:2	619.59	C40 H77 O3 N1	8.002	+H	8217.84	9.24724e+06	B	22780000
SM	SM(d40:2)	d40:2	784.646	C45 H89 O6 N2 P1	5.443	+H	29835.9	531.02	C	63830000
SM	SM(d40:3)	d40:3	782.63	C45 H87 O6 N2 P1	5.449	+H	58831	4500.48	C	19750000
SM	SM(d40:4)	d40:4	780.615	C45 H85 O6 N2 P1	5.454	+H	16600.2	3.0646e+06	C	7944000
SM	SM(d40:5)	d40:5	778.599	C45 H83 O6 N2 P1	5.451	+H	6214.38	1.19942e+06	C	4852000
SM	SM(d40:7)	d40:7	774.568	C45 H79 O6 N2 P1	5.388	+H	3625.5	25.48	C	1002000
Cer	Cer(d41:0)	d41:0	637.637	C41 H83 O3 N1	8.159	+H-H2O	3.38325e+06	1.194e+06	C	3383000
Cer	Cer(d18:1_23:0)	d41:1	635.622	C41 H81 O3 N1	8.143	+H	3.9226e+06	33721.6	B	3923000
SM	SM(d41:1)	d41:1	800.677	C46 H93 O6 N2 P1	5.432	+H	34255.4	281.62	C	16010000
Cer	Cer(d18:2_23:0)	d41:2	633.606	C41 H79 O3 N1	8.048	+H	2902.74	4.7698e+06	B	13200000
SM	SM(d41:2)	d41:2	798.662	C46 H91 O6 N2 P1	5.431	+H	43603.3	2254.17	C	20430000
SM	SM(d41:3)	d41:3	796.646	C46 H89 O6 N2 P1	5.437	+H	9279.09	2.04266e+06	C	4851000
Cer	Cer(d42:0)	d42:0	651.653	C42 H85 O3 N1	8.2	+H-H2O	1375.54	235.97	C	10810000
Cer	Cer(d42:1)	d42:1	649.637	C42 H83 O3 N1	8.097	+H-H2O	8258.58	974.54	C	7775000
HexCer	HexCer(d18:0+pO_24:1)	d42:1+eO	827.685	C48 H93 O9 N1	2.157	+H-H2O	15887.5	1.0734e+06	B	6979000
Cer	Cer(d18:0_24:2)	d42:2	647.622	C42 H81 O3 N1	8.086	+H	6286.71	9219.02	B	51490000
HexCer	HexCer(d18:1_24:1)	d42:2	809.674	C48 H91 O8 N1	2.219	+H	16417.5	1.06602e+06	A	7162000
SM	SM(d42:2)	d42:2	812.677	C47 H93 O6 N2 P1	5.427	+H	15699.8	606.01	C	114400000
Cer	Cer(d42:2+hO)	d42:2+hO	663.617	C42 H81 O4 N1	7.992	+H-2H2O	8.87488e+06	3.69984e+06	C	8875000
Cer	Cer(d18:1_24:2)	d42:3	645.606	C42 H79 O3 N1	8.003	+H	7721.71	1.10929e+07	B	29400000
HexCer	HexCer(d18:2_24:1)	d42:3	807.659	C48 H89 O8 N1	2.233	+H	3.35948e+06	571224	B	3359000
SM	SM(d42:3)	d42:3	810.662	C47 H91 O6 N2 P1	5.427	+H	10395.5	219.68	C	120100000
SM	SM(d42:3+pO)	d42:3+eO	826.656	C47 H91 O7 N2 P1	5.463	+H	1.20486e+06	81.82	C	1205000
SM	SM(d42:4)	d42:4	808.646	C47 H89 O6 N2 P1	5.432	+H	136709	275.12	C	50200000
SM	SM(d42:5)	d42:5	806.63	C47 H87 O6 N2 P1	5.425	+H	29717.2	3.25111e+06	C	17200000
SM	SM(d42:6)	d42:6	804.615	C47 H85 O6 N2 P1	5.417	+H	11229.2	3.3738e+06	C	9037000
Cer	Cer(d43:2)	d43:2	661.637	C43 H83 O3 N1	8.105	+H	1915.5	984827	C	3452000
SM	SM(d43:2)	d43:2	826.693	C48 H95 O6 N2 P1	5.421	+H	24309.4	847511	C	2615000
SM	SM(d43:5)	d43:5	820.646	C48 H89 O6 N2 P1	5.434	+H	5419.49	561589	C	1325000
SM	SM(d44:5)	d44:5	834.662	C49 H91 O6 N2 P1	5.424	+H	7.97566e+06	2.45597e+06	C	7976000
SM	SM(d44:6)	d44:6	832.646	C49 H89 O6 N2 P1	5.424	+H	17896	2.89612e+06	C	8460000
SM	SM(d44:7)	d44:7	830.63	C49 H87 O6 N2 P1	5.43	+H	9941.25	1.11949e+06	C	3109000
Co	Co(Q10)	Q10	862.684	C59 H90 O4	8.489	+H	1.99351e+07	8.38606e+06	A	19940000

## Sheet: YeastPichiaPastoris_HILICRP
Class	LipidMolec	FA Group Key	Calc Mass	Formula	BaseRt	MainIon	ARatio[s1/c]	MainS/N[s1]	MainGrade[s1]	MainArea[s1]
LPC	LPC(16:0)	16:0	495.332	C24 H50 O7 N1 P1	5.787	+HCOO	1105.13	10466.3	A	1917000
LPE	LPE(16:0)	16:0	453.286	C21 H44 O7 N1 P1	5.969	+H	762.458	1.30557e+06	B	2222000
LPC	LPC(16:1)	16:1	493.317	C24 H48 O7 N1 P1	5.766	+H	1710.47	2.76533e+06	A	5028000
LPC	LPC(18:0)	18:0	523.364	C26 H54 O7 N1 P1	5.754	+H	124.873	3.68238e+06	B	6800000
MG	MG(18:0)	18:0	358.308	C21 H42 O4	7.342	+H	506.225	39443.7	A	2305000
LPC	LPC(18:1)	18:1	521.348	C26 H52 O7 N1 P1	5.683	+H	490.307	282371	A	52310000
LPE	LPE(18:1)	18:1	479.301	C23 H46 O7 N1 P1	5.816	+H	2.51523e+06	6291.93	B	2515000
LPC	LPC(18:2)	18:2	519.332	C26 H50 O7 N1 P1	5.707	+H	689.714	3.0309e+07	A	58500000
LPE	LPE(18:2)	18:2	477.286	C23 H44 O7 N1 P1	5.845	+H	14281.3	2.75975e+06	B	5344000
LPC	LPC(18:3)	18:3	517.317	C26 H48 O7 N1 P1	5.78	+H	9765.62	2.69035e+06	B	4923000
PC	PC(30:1)	30:1	703.515	C38 H74 O8 N1 P1	5.006	+H	34748.5	4.66445e+06	C	10590000
PC	PC(30:2)	30:2	701.5	C38 H72 O8 N1 P1	5.019	+H	15462.2	3.47949e+06	C	7303000
PC	PC(31:1)	31:1	717.531	C39 H76 O8 N1 P1	5.004	+H	832.233	1.39898e+07	C	36000000
DG	DG(16:0_16:0)	32:0	568.507	C35 H68 O5	7.807	+NH4	187.04	1.72006e+06	A	3566000
PE	PE(32:0)	32:0	691.515	C37 H74 O8 N1 P1	5.008	+Na	3175.67	1.17593e+07	C	24200000
PC	PC(32:1)	32:1	731.547	C40 H78 O8 N1 P1	4.967	+H	2997.7	4.58243e+07	C	114200000
PE	PE(16:0_16:1)	32:1	689.5	C37 H72 O8 N1 P1	5.044	+H	11016.6	1.05262e+06	B	4582000
PC	PC(32:2)	32:2	729.531	C40 H76 O8 N1 P1	4.973	+H	78585.4	1.35063e+08	C	302400000
PE	PE(16:1_16:1)	32:2	687.484	C37 H70 O8 N1 P1	5.049	+H	6192.05	846513	B	2323000
PC	PC(32:3)	32:3	727.515	C40 H74 O8 N1 P1	4.989	+H	3.39686e+07	1.48389e+07	C	33970000
PC	PC(18:2_14:2)	32:4	725.5	C40 H72 O8 N1 P1	5.009	+H	9923.31	2.14921e+06	B	4687000
PC	PC(33:2)	33:2	743.547	C41 H78 O8 N1 P1	4.956	+H	2100.5	5.08558e+07	C	149700000
PE	PE(15:0_18:2)	33:2	701.5	C38 H72 O8 N1 P1	5.023	-H	860986	445393	B	861000
PC	PC(33:3)	33:3	741.531	C41 H76 O8 N1 P1	4.975	+H	1672.33	231.82	C	125100000
DG	DG(18:0_16:0)	34:0	596.538	C37 H72 O5	7.885	+NH4	305.825	3.12704e+06	A	6357000
DG	DG(16:0_18:1)	34:1	594.522	C37 H70 O5	7.808	+NH4	1369.84	181.83	A	12340000
PE	PE(34:1)	34:1	717.531	C39 H76 O8 N1 P1	5.014	+H	883.419	1.42072e+07	C	38220000
PG	PG(16:0_18:1)	34:1	748.525	C40 H77 O10 N0 P1	3.707	-H	2.73114e+06	1.25442e+06	B	2731000
PI	PI(16:0_18:1)	34:1	836.542	C43 H81 O13 N0 P1	6.062	-H	2554.88	2.85832e+06	A	6579000
DG	DG(16:0_18:2)	34:2	592.507	C37 H68 O5	7.736	+NH4	36324.9	1312.18	A	61840000
DMPE	DMPE(16:1_18:1)	34:2	743.547	C41 H78 O8 N1 P1	3.288	+H	12458.4	486278	A	3944000
PC	PC(16:0_18:2)	34:2	757.562	C42 H80 O8 N1 P1	4.932	+H	2082.85	9.08812e+08	B	2153000000
PE	PE(16:0_18:2)	34:2	715.515	C39 H74 O8 N1 P1	5.014	+H	1009.68	4.57348e+07	A	104600000
PG	PG(16:0_18:2)	34:2	746.51	C40 H75 O10 N0 P1	3.717	-H	1.54624e+06	688149	B	1546000
PI	PI(16:0_18:2)	34:2	834.526	C43 H79 O13 N0 P1	6.066	-H	3723.79	2.76656e+06	A	5931000
DG	DG(16:1_18:2)	34:3	590.491	C37 H66 O5	7.673	+NH4	9.44085e+06	4.05048e+06	A	9441000
PC	PC(34:3)	34:3	755.547	C42 H78 O8 N1 P1	4.943	+H	32742.2	4.94296e+08	C	1129000000
PE	PE(16:1_18:2)	34:3	713.5	C39 H72 O8 N1 P1	5.018	+H	3402.15	92.21	A	25390000
DG	DG(16:1_18:3)	34:4	588.475	C37 H64 O5	7.617	+NH4	1.57029e+06	785398	B	1570000
PC	PC(16:1_18:3)	34:4	753.531	C42 H76 O8 N1 P1	4.957	+H	450109	9.80865e+07	A	225800000
PE	PE(16:1_18:3)	34:4	711.484	C39 H70 O8 N1 P1	5.032	+H	3.56234e+06	1.20387e+06	B	3562000
PC	PC(34:5)	34:5	751.515	C42 H74 O8 N1 P1	4.973	+H	12914.2	6.55121e+06	C	15000000
PS	PS(35:1)	35:1	775.536	C41 H78 O10 N1 P1	4.973	-H	12213.4	5.51035e+06	C	12050000
PC	PC(35:2)	35:2	771.578	C43 H82 O8 N1 P1	4.907	+H	5962.33	7.8327e+07	C	235300000
DG	DG(17:1_18:2)	35:3	604.507	C38 H68 O5	7.714	+NH4	5.11042e+06	3.98556e+06	A	5110000
PC	PC(35:3)	35:3	769.562	C43 H80 O8 N1 P1	4.918	+H	31438.5	1.00203e+08	C	253800000
PE	PE(17:1_18:2)	35:3	727.515	C40 H74 O8 N1 P1	4.996	-H	1.63704e+06	839794	A	1637000
PC	PC(35:4)	35:4	767.547	C43 H78 O8 N1 P1	4.933	+H	3464.35	4.567e+07	C	103800000
PE	PE(35:4)	35:4	725.5	C40 H72 O8 N1 P1	5	+H	9925.82	2.14863e+06	C	4688000
PC	PC(35:5)	35:5	765.531	C43 H76 O8 N1 P1	4.949	+H	1420.18	5.90015e+06	C	16330000
DG	DG(18:0_18:0)	36:0	624.569	C39 H76 O5	7.973	+NH4	1379.64	982684	A	2854000
DG	DG(18:0_18:1)	36:1	622.554	C39 H74 O5	7.883	+NH4	297.266	1.25555e+06	B	3434000
DG	DG(18:1_18:1)	36:2	620.538	C39 H72 O5	7.806	+NH4	2.52572e+07	49213.3	A	25260000
DMPE	DMPE(18:1_18:1)	36:2	771.578	C43 H82 O8 N1 P1	3.133	+H	27085.4	1.65513e+06	A	11130000
PC	PC(36:2)	36:2	785.593	C44 H84 O8 N1 P1	4.886	+H	1986.42	177832	C	3213000000
PE	PE(18:1_18:1)	36:2	743.547	C41 H78 O8 N1 P1	4.97	-H	644.689	4.26954e+06	A	11890000
PI	PI(18:1_18:1)	36:2	862.557	C45 H83 O13 N0 P1	6.026	-H	1850.58	733671	A	1669000
DG	DG(18:1_18:2)	36:3	618.522	C39 H70 O5	7.739	+NH4	1.03204e+08	57185.7	A	103200000
DMPE	DMPE(18:1_18:2)	36:3	769.562	C43 H80 O8 N1 P1	3.168	+H	21615.2	1362486	A	8846000
PC	PC(18:1_18:2)	36:3	783.578	C44 H82 O8 N1 P1	4.901	+H	6129.85	6588.73	B	3634000000
PE	PE(18:1_18:2)	36:3	741.531	C41 H76 O8 N1 P1	4.978	-H	956.133	11011.2	A	20300000
PI	PI(18:1_18:2)	36:3	860.542	C45 H81 O13 N0 P1	6.032	-H	1039.61	55478.8	A	1340000
DG	DG(18:1_18:3)	36:4	616.507	C39 H68 O5	7.681	+NH4	3.66332e+07	72751	A	36630000
DMPE	DMPE(18:2_18:2)	36:4	767.547	C43 H78 O8 N1 P1	3.217	+H	11790.5	883898	A	5575000
PC	PC(18:2_18:2)	36:4	781.562	C44 H80 O8 N1 P1	4.913	+H	7373.27	3530.06	A	2573000000
PE	PE(18:2_18:2)	36:4	739.515	C41 H74 O8 N1 P1	4.99	+H	2115.65	6.90318e+07	A	154400000
PS	PS(18:2_18:2)	36:4	783.505	C42 H74 O10 N1 P1	5.012	-H	1.08296e+06	457138	B	1083000
DG	DG(18:3_18:2)	36:5	614.491	C39 H66 O5	7.626	+NH4	5.73819e+06	3.19129e+06	A	5738000
PC	PC(36:5)	36:5	779.547	C44 H78 O8 N1 P1	4.929	+H	13389.5	6037.07	C	522000000
PE	PE(18:3_18:2)	36:5	737.5	C41 H72 O8 N1 P1	5.007	+H	3195.61	145.76	A	27780000
PC	PC(36:6)	36:6	777.531	C44 H76 O8 N1 P1	4.945	+H	124967	1.88336e+07	C	44200000
PS	PS(37:1)	37:1	803.568	C43 H82 O10 N1 P1	4.933	-H	586.149	2.59348e+07	C	71170000
PC	PC(37:2)	37:2	799.609	C45 H86 O8 N1 P1	4.88	+H	22880.8	6033.74	C	27340000
PS	PS(37:2)	37:2	801.552	C43 H80 O10 N1 P1	4.948	-H	32714.8	2.03252e+07	C	42250000
PC	PC(37:4)	37:4	795.578	C45 H82 O8 N1 P1	4.905	+H	9316.62	1866.1	C	7515000
PC	PC(18:1_20:2)	38:3	811.609	C46 H86 O8 N1 P1	4.865	+H	386.317	8873.48	B	87880000
PC	PC(20:2_18:2)	38:4	809.593	C46 H84 O8 N1 P1	4.879	+H	279.58	3.00894e+07	B	89710000
PC	PC(38:5)	38:5	807.578	C46 H82 O8 N1 P1	4.874	+H	389.257	1.69064e+07	C	44410000
PC	PC(38:6)	38:6	805.562	C46 H80 O8 N1 P1	4.887	+H	617.267	6.67493e+06	C	28310000
PS	PS(39:1)	39:1	831.599	C45 H86 O10 N1 P1	4.886	-H	485.212	3.31022e+07	C	91640000
PS	PS(41:2)	41:2	857.615	C47 H88 O10 N1 P1	4.87	-H	732.47	1.25021e+06	C	2656000
TG	TG(16:0_14:0_16:1)	46:1	776.689	C49 H92 O6	8.287	+NH4	15.073	724876	A	1976000
TG	TG(16:1_14:0_16:1)	46:2	774.674	C49 H90 O6	8.182	+NH4	77.451	497061	A	1149000
TG	TG(16:0_16:0_16:0)	48:0	806.736	C51 H98 O6	8.534	+NH4	11.113	1699.25	A	2495000
TG	TG(16:0_14:0_18:1)	48:1	804.721	C51 H96 O6	8.404	+NH4	88.654	3.25223e+06	A	8131000
TG	TG(16:1_14:0_18:1)	48:2	802.705	C51 H94 O6	8.28	+NH4	238.866	227.48	A	14830000
TG	TG(16:1_14:0_18:2)	48:3	800.689	C51 H92 O6	8.179	+NH4	2994.63	2.7083e+06	A	6399000
TG	TG(15:0_16:0_18:1)	49:1	818.736	C52 H98 O6	8.466	+NH4	65.363	615304	A	1940000
TG	TG(15:0_16:1_18:1)	49:2	816.721	C52 H96 O6	8.334	+NH4	225.522	1.23407e+06	A	4996000
TG	TG(16:1_16:1_17:1)	49:3	814.705	C52 H94 O6	8.228	+NH4	2560.47	11169.4	A	2842000
TG	TG(18:0_16:0_16:0)	50:0	834.768	C53 H102 O6	8.684	+NH4	12.324	52.99	A	1803000
TG	TG(16:0_16:0_18:1)	50:1	832.752	C53 H100 O6	8.529	+NH4	521.24	282.36	A	52710000
TG	TG(16:0_16:1_18:1)	50:2	830.736	C53 H98 O6	8.392	+NH4	619.27	172.69	A	94050000
TG	TG(16:1_16:1_18:1)	50:3	828.721	C53 H96 O6	8.281	+NH4	11865	3.09898e+07	A	73840000
TG	TG(16:1_16:1_18:2)	50:4	826.705	C53 H94 O6	8.18	+NH4	2.48398e+07	14476.3	A	24840000
TG	TG(16:1_16:1_18:3)	50:5	824.689	C53 H92 O6	8.094	+NH4	2132.23	1.60453e+06	A	4471000
TG	TG(16:0_17:0_18:1)	51:1	846.768	C54 H102 O6	8.591	+NH4	358.646	471730	A	1388000
TG	TG(16:0_17:1_18:1)	51:2	844.752	C54 H100 O6	8.451	+NH4	2290.95	82.44	A	8444000
TG	TG(16:1_17:1_18:1)	51:3	842.736	C54 H98 O6	8.333	+NH4	1.67223e+07	74652.7	A	16720000
TG	TG(16:1_17:1_18:3)	51:5	838.705	C54 H94 O6	8.139	+NH4	97.774	891568	A	2694000
TG	TG(18:0_16:0_18:0)	52:0	862.799	C55 H106 O6	8.833	+NH4	32.94	606394	A	2044000
TG	TG(16:0_18:1_18:1)	52:2	858.768	C55 H102 O6	8.517	+NH4	1360.53	386.96	A	122500000
TG	TG(16:1_18:1_18:2)	52:4	854.736	C55 H98 O6	8.285	+NH4	15488.3	1185.15	A	167800000
TG	TG(16:1_18:2_18:2)	52:5	852.721	C55 H96 O6	8.185	+NH4	31226.5	50356.6	A	56210000
TG	TG(16:1_18:3_18:3)	52:7	848.689	C55 H92 O6	8.019	+NH4	115.707	745860	A	1695000
TG	TG(19:1_16:0_18:1)	53:2	872.783	C56 H104 O6	8.541	+NH4	4363.94	399.35	A	7176000
TG	TG(18:1_17:1_18:2)	53:4	868.752	C56 H100 O6	8.331	+NH4	9740.47	164.49	A	16190000
TG	TG(18:3_17:1_18:2)	53:6	864.721	C56 H96 O6	8.143	+NH4	3.00658e+06	10366.9	A	3007000
TG	TG(18:0_18:0_18:1)	54:1	888.815	C57 H108 O6	8.818	+NH4	261.063	71.39	A	2084000
TG	TG(18:0_18:1_18:1)	54:2	886.799	C57 H106 O6	8.65	+NH4	102.131	154.96	A	18240000
TG	TG(18:1_18:1_18:1)	54:3	884.783	C57 H104 O6	8.514	+NH4	2893.14	444.89	A	129700000
TG	TG(18:1_18:1_18:2)	54:4	882.768	C57 H102 O6	8.389	+NH4	881.739	642.28	B	185800000
TG	TG(18:2_18:2_18:2)	54:6	878.736	C57 H98 O6	8.183	+NH4	26240.6	2.4369e+07	A	54180000
TG	TG(18:3_18:2_18:3)	54:8	874.705	C57 H94 O6	8.025	+NH4	587.782	1.11823e+06	A	2480000
TG	TG(19:1_18:1_18:1)	55:3	898.799	C58 H106 O6	8.53	+NH4	3634.9	122.2	A	4912000
TG	TG(18:1_18:1_22:0)	58:2	942.861	C61 H114 O6	8.994	+NH4	3.89019e+06	3364.14	A	3890000
TG	TG(25:0_16:1_18:1)	59:2	956.877	C62 H116 O6	9.088	+NH4	2.35506e+06	499802	A	2355000
TG	TG(18:1_18:1_24:0)	60:2	970.893	C63 H118 O6	9.17	+NH4	5.87491e+06	71.76	A	5875000
TG	TG(24:0_18:2_18:2)	60:4	966.861	C63 H114 O6	8.829	+NH4	1167.41	642440	A	2171000
TG	TG(25:0_18:1_18:2)	61:3	982.893	C64 H118 O6	9.082	+NH4	1812.38	122	A	2877000
TG	TG(26:0_18:1_18:2)	62:3	996.909	C65 H120 O6	9.169	+NH4	4666.94	72.32	A	3202000
Cer	Cer(d28:1+hO)	d28:1+hO	469.413	C28 H55 O4 N1	7.426	+H	144.129	394244	C	561500
Cer	Cer(d20:0_16:0)	d36:0	567.559	C36 H73 O3 N1	7.938	+H	299.624	330649	B	809100
Cer	Cer(d18:0+pO_24:0+O)	d42:0+pO+O	683.643	C42 H85 O5 N1	7.876	+H	2.20779e+06	1.12958e+06	B	2208000
Cer	Cer(d18:0+pO_25:0+O)	d43:0+pO+O	697.658	C43 H87 O5 N1	7.915	+H	907194	443809	B	907200
Cer	Cer(d18:0+pO_26:0+O)	d44:0+pO+O	711.674	C44 H89 O5 N1	7.958	+H	534.249	506832	B	1217000
Co	Co(Q6)	Q6	590.433	C39 H58 O4	7.988	+H	410.871	603903	A	1012000
Co	Co(Q7)	Q7	658.496	C44 H66 O4	7.86	+NH4	976.066	1.16153e+06	A	2809000
Co	Co(Q8)	Q8	726.559	C49 H74 O4	7.986	+H	72706.9	23937.1	A	69720000

## Sheet: HumanPlasmaSRM1950_Shotgun
Class	LipidMolec	Intensity
CE	CE [16:0]	833268
CE	CE [16:1]	2.89758e+06
CE	CE [17:1]	27421.8
CE	CE [18:0]	27923.4
CE	CE [18:1]	8.18881e+06
CE	CE [18:2]	5.40388e+07
CE	CE [18:3]	2.72649e+06
CE	CE [20:3]	817056
CE	CE [20:4]	1.31373e+07
CE	CE [20:5]	1.27346e+06
CE	CE [22:5]	23188.2
Cer	Cer [32:4:3]	313122
Cer	Cer [42:2:2]	39375
ST	Cholesterol	86772.5
DG	DG [34:1]	282470
DG	DG [34:2]	825174
DG	DG [34:3]	107124
DG	DG [36:2]	1.005e+06
DG	DG [36:3]	1.29852e+06
DG	DG [36:5]	36979.1
LPC	LPC [16:0]	1.19913e+07
LPC	LPC [18:0]	3.3032e+06
LPC	LPC [18:1]	3.01308e+06
LPC	LPC [18:2]	4.91254e+06
LPE	LPE [18:0]	39911.7
LPE	LPE [18:1]	22272.4
LPE	LPE [18:1]	9781.4
LPE	LPE [18:2]	95607.7
LPE	LPE [18:2]	24155.8
LPE	LPE [20:4]	69377.8
LPE	LPE [20:4]	17600.2
LPE	LPE [22:4]	2561.6
LPE	LPE [22:6]	6751.6
LPG	LPG [10:1]	4585.7
LPS	LPS [19:0]	103284
LPS	LPS [21:0]	531112
LPS	LPS [21:1]	872944
LPS	LPS [21:2]	9345.6
LPS	LPS [23:2]	60059.8
LPS	LPS [23:3]	224407
LPS	LPS [23:4]	6107.3
PC	PC [30:0]	715314
PC	PC [30:1]	34204.9
PC	PC [31:0]	47035.6
PC	PC [31:2]	27463.6
PC	PC [32:0]	3.04353e+06
PC	PC [32:1]	6678565
PC	PC [32:2]	1.52151e+06
PC	PC [32:3]	46197.1
PC	PC [33:0]	59625.8
PC	PC [33:1]	886088
PC	PC [33:2]	1.12779e+06
PC	PC [33:3]	45579.8
PC	PC [33:4]	93259.7
PC	PC [34:0]	71078.6
PC	PC [34:2]	1.80488e+08
PC	PC [34:3]	7.5009e+06
PC	PC [34:4]	1.5528e+06
PC	PC [35:1]	879068
PC	PC [35:2]	2.98698e+06
PC	PC [35:3]	1.07796e+06
PC	PC [35:4]	978947
PC	PC [35:6]	115522
PC	PC [36:1]	8.00323e+06
PC	PC [36:2]	8.35867e+07
PC	PC [36:3]	5.80476e+07
PC	PC [36:4]	105931813
PC	PC [37:2]	171302
PC	PC [37:4]	2.0773e+06
PC	PC [38:2]	811898
PC	PC [38:4]	5.02876e+07
PC	PC [38:5]	4.02085e+07
PC	PC [38:6]	37096952
PC	PC [39:4]	87398.4
PC	PC [39:5]	228029
PC	PC [39:6]	708695
PC	PC [40:5]	4.24984e+06
PC	PC [40:6]	1.00531e+07
PC	PC [42:6]	22857.8
PC	PC [44:4]	200702
PC	PC [45:0]	21153.5
PC	PC-O [20:1]	24151.1
PC	PC-O [20:2]	65740.4
PC	PC-O [22:4]	21417.7
PC	PC-O [22:5]	177721
PC	PC-O [22:6]	661202
PC	PC-O [24:5]	57753.3
PC	PC-O [32:0]	327938
PC	PC-O [32:1]	489115
PC	PC-O [32:2]	37273.4
PC	PC-O [33:3]	25939
PC	PC-O [33:4]	37972.8
PC	PC-O [34:1]	1.16806e+06
PC	PC-O [34:2]	2.30311e+06
PC	PC-O [34:3]	2.73057e+06
PC	PC-O [35:3]	32461.8
PC	PC-O [35:4]	20756.6
PC	PC-O [35:5]	263246
PC	PC-O [35:6]	484485
PC	PC-O [35:7]	114080
PC	PC-O [36:2]	693614
PC	PC-O [36:3]	2.00951e+06
PC	PC-O [36:4]	6.48125e+06
PC	PC-O [36:5]	4.88799e+06
PC	PC-O [37:5]	249072
PC	PC-O [37:6]	36411.8
PC	PC-O [37:7]	86414.7
PC	PC-O [38:3]	119480
PC	PC-O [38:4]	3.02702e+06
PC	PC-O [38:6]	2.87673e+06
PC	PC-O [40:4]	405723
PC	PC-O [40:5]	1.08519e+06
PC	PC-O [40:6]	1217843
PC	PC-O [40:7]	1.30475e+06
PC	PC-O [42:4]	84212.3
PC	PC-O [42:5]	465098
PC	PC-O [42:6]	347674
PC	PC-O [42:7]	104807
PC	PC-O [44:4]	292163
PC	PC-O [44:5]	366300
PC	PC-O [44:6]	347940
PC	PC-O [44:7]	67408.4
PE	PE [34:1]	3283.5
PE	PE [34:2]	27463.6
PE	PE [35:2]	1.52151e+06
PE	PE [35:3]	46197.1
PE	PE [36:2]	1.12779e+06
PE	PE [36:2]	112226
PE	PE [36:3]	45579.8
PE	PE [36:3]	21861.9
PE	PE [36:4]	93259.7
PE	PE [36:4]	38093.3
PE	PE [38:4]	978947
PE	PE [38:6]	115522
PE	PE-O [20:4]	69377.8
PG	PG [34:1]	13534.9
PG	PG [36:2]	4439.3
PI	PI [34:2]	2986.3
PI	PI [38:1]	44262.1
SM	SM [21:1:2]	133163
SM	SM [23:3:2]	246636
SM	SM [32:1:2]	991243
SM	SM [32:2:2]	46717.4
SM	SM [33:1:2]	217308
SM	SM [33:2:2]	986106
SM	SM [34:0:2]	69481
SM	SM [34:1:2]	7.87286e+06
SM	SM [34:2:2]	2.80843e+06
SM	SM [35:1:2]	37887.2
SM	SM [36:0:2]	77323.4
SM	SM [36:1:2]	1.07393e+06
SM	SM [36:2:2]	1.52363e+06
SM	SM [36:3:2]	143171
SM	SM [38:1:2]	143939
SM	SM [38:2:2]	512095
SM	SM [40:1:2]	202219
SM	SM [40:2:2]	1.42964e+06
SM	SM [40:3:2]	166335
SM	SM [41:2:2]	390440
SM	SM [42:2:2]	1.89824e+06
SM	SM [42:3:2]	2.3265e+06
SM	SM [42:4:2]	507714
SM	SM [43:2:2]	41659.4
SM	SM [45:2:2]	195220
TG	TG [46:1]	1.15e+06
TG	TG [46:2]	834984
TG	TG [48:0]	581161
TG	TG [48:1]	3.68578e+06
TG	TG [48:3]	1.77592e+06
TG	TG [50:1]	7.00594e+06
TG	TG [50:3]	1.02403e+07
TG	TG [50:4]	3.44434e+06
TG	TG [51:2]	909471
TG	TG [51:3]	947767
TG	TG [52:2]	2.10485e+07
TG	TG [52:4]	2.45046e+07
TG	TG [52:5]	6.88128e+06
TG	TG [52:6]	1296027
TG	TG [53:3]	687423
TG	TG [53:4]	586001
TG	TG [54:3]	7.21511e+06
TG	TG [54:4]	1.24005e+07
TG	TG [54:7]	2.05539e+06
TG	TG [56:7]	3326046
TG	TG [56:8]	1.79268e+06
TG	TG [58:8]	579588
TG	TG [58:9]	526109

## Sheet: YeastPichiPastoris_Shotgun
Class	LipidMolec	Intensity
DG	DG [32:2]	42224.4
DG	DG [33:1]	33938.2
DG	DG [34:1]	3.02377e+06
DG	DG [34:2]	2.68316e+06
DG	DG [34:3]	720072
DG	DG [35:2]	100460
DG	DG [36:1]	1.09318e+06
DG	DG [36:2]	2.98549e+06
DG	DG [36:3]	2.68861e+06
LPC	LPC [18:1]	139840
LPC	LPC [18:2]	132417
LPE	LPE [18:1]	56895.8
LPE	LPE [18:2]	95904.4
LPE	LPE [18:2]	34105.9
LPE	LPE [18:3]	4147.5
LPG	LPG [22:2]	1973.5
LPS	LPS [19:0]	93860.9
LPS	LPS [19:1]	10487.4
LPS	LPS [19:2]	16559
LPS	LPS [20:0]	5875.3
LPS	LPS [21:0]	501534
LPS	LPS [21:1]	494659
LPS	LPS [21:2]	33906.4
LPS	LPS [23:3]	1707.2
PA	PA [34:3]	44756.2
PA	PA [36:2]	222511
PA	PA [36:3]	227843
PA	PA [36:4]	242372
PC	PC [29:0]	150393
PC	PC [29:1]	319767
PC	PC [29:2]	51922.8
PC	PC [30:1]	38422.8
PC	PC [30:2]	56929.9
PC	PC [31:1]	1.50186e+06
PC	PC [31:2]	5.01517e+06
PC	PC [32:1]	1255164
PC	PC [32:2]	4.24255e+06
PC	PC [32:3]	495955
PC	PC [32:4]	32702
PC	PC [33:1]	422610
PC	PC [33:2]	3923771
PC	PC [33:3]	3.98707e+06
PC	PC [33:4]	6.06309e+06
PC	PC [34:2]	3.56886e+07
PC	PC [34:3]	1.90027e+07
PC	PC [34:4]	3.47458e+06
PC	PC [35:2]	5.02689e+06
PC	PC [35:3]	5.21966e+06
PC	PC [35:4]	2.12759e+06
PC	PC [36:1]	886825
PC	PC [36:2]	5.5256e+07
PC	PC [36:3]	7.16687e+07
PC	PC [36:4]	5.20286e+07
PC	PC [37:2]	215203
PC	PC [37:4]	198142
PC	PC [38:2]	346558
PC	PC [38:4]	876644
PE	PE [32:1]	319767
PE	PE [32:2]	52593.4
PE	PE [33:2]	56929.9
PE	PE [34:1]	1.50186e+06
PE	PE [34:2]	5.01517e+06
PE	PE [34:3]	1.38984e+06
PE	PE [34:4]	48574.5
PE	PE [35:2]	4.24255e+06
PE	PE [35:3]	495955
PE	PE [35:4]	38455.7
PE	PE [36:2]	1.28288e+06
PE	PE [36:3]	3.98707e+06
PE	PE [36:4]	6.06309e+06
PE	PE [38:4]	2.12759e+06
PG	PG [34:1]	180169
PG	PG [34:2]	127510
PG	PG [34:3]	5098.7
PG	PG [36:2]	2805.2
PG	PG [36:4]	14723.6
PI	PI [34:2]	606718
PS	PS [34:1]	28799.5
TG	TG [48:1]	47150.2
TG	TG [48:3]	85625.6
TG	TG [50:1]	1035639
TG	TG [50:3]	1.79261e+06
TG	TG [50:4]	906267
TG	TG [51:2]	62762.3
TG	TG [51:3]	278456
TG	TG [52:2]	2.11253e+06
TG	TG [52:4]	3.92058e+06
TG	TG [52:6]	553844
TG	TG [53:3]	245646
TG	TG [53:4]	296203
TG	TG [54:3]	2.20881e+06
TG	TG [54:4]	3.16619e+06
TG	TG [54:7]	528082
TG	TG [55:4]	23147

## Sheet: AdditionalInfo
Abbr.	Lipid class
DG	diglyceride
TG	triglyceride
MG	monoglyceride
Cer	ceramide
CE	cholesterol ester
PE	phosphatidylethanolamine
LPE	lysophosphatidylethanolamine
DMPE	dimethyl-phosphatidylethanolamine
PC	phosphatidylcholine
LPC	lysophosphatidylcholine
PG	phosphatidylglycerol
PI	phosphatidylinositol
PS	phosphatidylserine
PA	phosphatidic acid
SM	sphingomyelin
AcCa	acyl carnitine
Co	coenzyme
ST	sterol
HexCer	hexosyl ceramide
	HILIC-RP-HRMS was analysed by Lipid Search 4.1
Main Grade	Explanation
A	lipid class and fatty acids are completely identified
B	lipid class and some fatty acids are identified
C	lipid class or fatty acids are identified
*retention time shifts of the identification runs compared to the quantification runs with standards are due to different measurement days and capillary lengths used
	Direct infusion shotgun data was analysed by LipidXplorer
